# Supplementary material
Source: PubMed Central journal article supplement (PMC6924279)
Supplement: NIHMS1059977-supplement-Supplemental_Material.pdf [file NIHMS1059977-supplement-Supplemental_Material.pdf]

# **SUPPLEMENTAL MATERIAL**

## **Debate on surgery versus conservative management**

Due to the very low risk of seizure in incidental CCM cases and the potential risks associated with surgical intervention the conservative approach versus surgical management has always been a debate.<sup>1-3</sup> Surgical resection might be considered for easily reachable asymptomatic lesions in non-eloquent area, in order to avoid any future bleeding, psychological burden, expensive and time-consuming follow-ups, in patients who might require anticoagulation therapy, or to accommodate lifestyle or career decisions.<sup>8</sup> Numerous studies have investigated the effectiveness of conservative approach for management of CCMs and reported mixed outcomes.<sup>4-6</sup> Fernandez et al. did not find any significant difference between the two approaches while Porter et al. found worse long-term outcomes in conservatively managed patients (42% poorer outcome) versus the patients who had surgical intervention (9%).<sup>4,5</sup> In studies on patients who were managed and followed conservatively Garrett and Spetzler reported that 50% of the 14 patients improved or remained at their baseline, while Bozinov et al. reported that none of their 50 patients ever suffered a life-threatening bleed.<sup>6,7</sup> However, these and many other similar studies dealing with this issue previously had small cohorts, were not randomized clinical trials (RCT) and many other biases from patient selection to long term follow-up. Therefore, an RCT evaluating conservative management versus early surgery is highly warranted.

With improving technology, microsurgical resection of CCMs has gained recognition in the early 21<sup>st</sup> century. Other less invasive methods like radiosurgery have not gained momentum in CCM management due to associated complications.<sup>8</sup> However, various groups have reported benefit with stereotactic radiosurgery in selective cases including deeper cavernomas.<sup>9,10</sup> Gamma Knife radiosurgery is still being utilized in patients with CCM who are high risk for resection.<sup>11,12</sup> Various studies have advocated for brain stem cavernoma resection after ICH. Dukatz et al reported good outcomes in 71 patients after microsurgical resection of brainstem cavernomas.<sup>13</sup> However, a population-based Scottish study comparing surgical excision to conservative approach has raised question regarding the surgical option.<sup>14</sup> In this nonrandomized prospective study, Moultrie et al have reported poorer 5 years outcome with higher risk of symptomatic ICH and new onset FND in CCM patients undergoing surgery.<sup>14</sup> Hence, after decades of neurosurgical practice and extensive research relating to CCM, evidence supporting surgical resection of CCM remains conflicting. Thus, an RCT evaluating conservative management versus early surgery is highly warranted.

**Supplemental figure I:** MRI of FCCM patient with SWI (A) demonstrates multifocal cavernomas in bilateral cerebral hemispheres while the same slice location on conventional T2 (B) shows the single periventricular classic "popcorn" lesion correlating with the large left frontal lobe cavernoma on SWI but does not clearly show the smaller lesions. Similarly, in another FCCM patient SWI (C) demonstrates right posterior temporal cavernoma (black arrow) and another much smaller lesion in the mid-temporal region (red arrow) while the conventional T2 sequence does not show the smaller lesion.

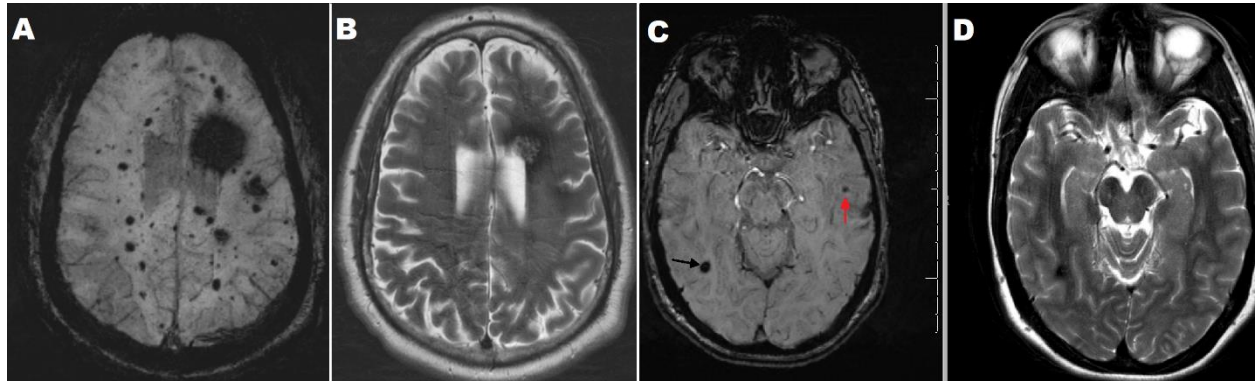

**Supplemental table I:** Type of molecular genetic testing and proportion of pathogenic variants detected in FCCM.

| Gene   | Proportion of FCCM Attributed to Pathogenic Variants in this Gene | Proportion of Pathogenic Variants Detected by Test Method |                                             |
|--------|-------------------------------------------------------------------|-----------------------------------------------------------|---------------------------------------------|
|        |                                                                   | Sequence Analysis                                         | Gene-targeted deletion/duplication analysis |
| KRIT1  | 53%-65%                                                           | 85%-95%                                                   | 5%-15%                                      |
| CCM2   | 20%                                                               | 40%-70%                                                   | 30%-60%                                     |
| PDCD10 | 10%-16%                                                           | 80%-90%                                                   | 0%-10%                                      |

## References

1. Dalyai RT, Ghobrial G, Awad I, Tjoumakaris S, Gonzalez LF, Dumont AS, et al. Management of incidental cavernous malformations: A review. *Neurosurgical focus*. 2011;31:E5
2. Rosenow F, Alonso-Vanegas MA, Baumgartner C, Blümcke I, Carreño M, Gizewski ER, et al. Cavernoma-related epilepsy: Review and recommendations for management—report of the surgical task force of the ilae commission on therapeutic strategies. *Epilepsia*. 2013;54:2025-2035
3. Moore SA, Brown Jr RD, Christianson TJ, Flemming KD. Long-term natural history of incidentally discovered cavernous malformations in a single-center cohort. *Journal of neurosurgery*. 2014;120:1188-1192
4. Fernández S, Miró J, Falip M, Coello A, Plans G, Castañer S, et al. Surgical versus conservative treatment in patients with cerebral cavernomas and non refractory epilepsy. *Seizure*. 2012;21:785-788
5. Porter RW, Detwiler PW, Spetzler RF, Lawton MT, Baskin JJ, Derksen PT, et al. Cavernous malformations of the brainstem: Experience with 100 patients. *Journal of neurosurgery*. 1999;90:50-58
6. Garrett M, Spetzler RF. Surgical treatment of brainstem cavernous malformations. *Surgical neurology*. 2009;72:S3-S9
7. Bozinov O, Hatano T, Sarnthein J, Burkhardt J, Bertalanffy H. Current clinical management of brainstem cavernomas. *Swiss Med Wkly*. 2010;140:w13120
8. Kim DG, Choe WJ, Paek SH, Chung HT, Kim IH, Han DH. Radiosurgery of intracranial cavernous malformations. *Acta neurochirurgica*. 2002;144:869-878; discussion 878
9. Monaco EA, Khan AA, Niranjana A, Kano H, Grandhi R, Kondziolka D, et al. Stereotactic radiosurgery for the treatment of symptomatic brainstem cavernous malformations. *Neurosurg Focus*. 2010;29:E11
10. Lunsford LD, Khan AA, Niranjana A, Kano H, Flickinger JC, Kondziolka D. Stereotactic radiosurgery for symptomatic solitary cerebral cavernous malformations considered high risk for resection. *J Neurosurg*. 2010;113:23-29
11. Park SH, Hwang SK. Gamma knife radiosurgery for symptomatic brainstem intra-axial cavernous malformations. *World Neurosurg*. 2013;80:e261-266
12. Nicolato A, Longhi M, Tommasi N, Ricciardi GK, Spinelli R, Foroni RI, et al. Leksell gamma knife for pediatric and adolescent cerebral arteriovenous malformations: Results of 100 cases followed up for at least 36 months. *Journal of neurosurgery. Pediatrics*. 2015;16:736-747
13. Dukatz T, Sarnthein J, Sitter H, Bozinov O, Benes L, Sure U, et al. Quality of life after brainstem cavernoma surgery in 71 patients. *Neurosurgery*. 2011;69:689-695
14. Moultrie F, Horne MA, Josephson CB, Hall JM, Counsell CE, Bhattacharya JJ, et al. Outcome after surgical or conservative management of cerebral cavernous malformations. *Neurology*. 2014;83:582-589
